# Supplementary material for: Morin Hydrate Reverses Cisplatin Resistance by Impairing PARP1/HMGB1-Dependent Autophagy in Hepatocellular Carcinoma
Source: PubMed Central journal article supplement (PMC6678360; doi:10.3390/cancers11070986), 2019-07-15
Supplement: cancers-11-00986-s001.pdf [file cancers-11-00986-s001.pdf]

Supplementary Materials

# Morin Hydrate Reverses Cisplatin Resistance by Impairing PARP1/HMGB1-Dependent Autophagy in Hepatocellular Carcinoma

Mahendra Pal Singh, Hee Jun Cho, Jong-Tae Kim, Kyoung Eun Baek, Hee Gu Lee and Sun Chul Kang

**Table S1.** List of antibodies for Western blot analysis.

| Antibodies              | Dilution Used | Source                   | Catalog No. |
|-------------------------|---------------|--------------------------|-------------|
| $\beta$ -actin          | 1:1000        | Santa Cruz Biotechnology | sc-1616     |
| Lamin B                 | 1:1000        | Santa Cruz Biotechnology | sc-6217     |
| ERCC1                   | 1:1000        | Santa Cruz Biotechnology | sc-17809    |
| ABCB-1                  | 1:1000        | Santa Cruz Biotechnology | sc-104019   |
| HMGB-1                  | 1:1000        | Cell signalling          | #3935       |
| PARP-1                  | 1:1000        | Santa Cruz Biotechnology | sc-7150     |
| PAR                     | 1:1000        | Calbiochem               | AM80        |
| SOD-1                   | 1:1000        | Santa Cruz Biotechnology | sc-11407    |
| SOD-2                   | 1:1000        | Santa Cruz Biotechnology | sc-30080    |
| Catalase                | 1:1000        | Santa Cruz Biotechnology | sc-50508    |
| Glutathione reductase   | 1:1000        | Santa Cruz Biotechnology | sc-32886    |
| JNK                     | 1:1000        | Santa Cruz Biotechnology | sc-571      |
| p-JNK                   | 1:1000        | Santa Cruz Biotechnology | sc-12882    |
| Bcl-2                   | 1:1000        | Cell signalling          | #2876       |
| p38                     | 1:1000        | Santa Cruz Biotechnology | sc-535      |
| p-P38                   | 1:1000        | Santa Cruz Biotechnology | sc-17853-R  |
| p53                     | 1:1000        | Santa Cruz Biotechnology | sc-6243     |
| PUMA                    | 1:1000        | Santa Cruz Biotechnology | sc-28226    |
| Cyt C                   | 1:1000        | Cell signalling          | #4272       |
| Casp-9                  | 1:1000        | Santa Cruz Biotechnology | sc-7885     |
| Casp-3                  | 1:1000        | Santa Cruz Biotechnology | sc-7148     |
| H2A.X                   | 1:1000        | Santa Cruz Biotechnology | sc-517336   |
| LC3I/II                 | 1:500         | Abcam                    | ab58610     |
| ATG-5                   | 1:1000        | Cell Signalling          | #12994      |
| ATG-7                   | 1:1000        | Cell Signalling          | #8558       |
| BECN-1                  | 1:1000        | Cell Signalling          | #3495       |
| p-62                    | 1:1000        | Cell Signalling          | #5114       |
| PI3-Kinase p85 $\alpha$ | 1:1000        | Santa Cruz Biotechnology | sc-1637     |

**Table S2.** Sequences of RT-PCR oligonucleotide primers.

| Gene                            | Direction | Sequences                            |
|---------------------------------|-----------|--------------------------------------|
| <i>Cyt c</i>                    | Forward   | 5'- CAA CAC CTC TCA CAT CTT AC-3'    |
|                                 | Reverse   | 5'-TCC CCA ATC AAA TAC ACA GTT-3'    |
| <i>Casp-3</i>                   | Forward   | 5'- GTG CTA CAA TGC CCC TGG AT-3'    |
|                                 | Reverse   | 5'- GCC CAT TCA TTT ATT GCT TTC C-3' |
| <i>PARP-1</i>                   | Forward   | 5'-TTC ACA TAT CAG CAA GTT ACC-3'    |
|                                 | Reverse   | 5'-CCT GAG CAA TAT CAT AGA CAA T-3'  |
| <i>BECN-1</i>                   | Forward   | 5'-TGG CAC AAT CAA TAA CTT CA-3'     |
|                                 | Reverse   | 5'-TAA GGA ACA AGT CGG TAT CT-3'     |
| <i>LC3II</i>                    | Forward   | 5'-GAG GTG TAT GAG AGT GAG AA-3'     |
|                                 | Reverse   | 5'-CTG TGA TTG GAT GAA CTG AT-3'     |
| <i><math>\beta</math>-actin</i> | Forward   | 5'-AAC TAC CTT CAA CTC CAT CA-3'     |
|                                 | Reverse   | 5'-GAG CAA TGA TCT TGA TCT TCA-3'    |

**Table S3.** Sequences of SiRNA for ATG5.

| Gene        | Direction | Sequences                        |
|-------------|-----------|----------------------------------|
| <i>Atg5</i> | Sense     | 5'- ACGCUAAAAGGCUUACAGUAUCAGA-3' |
|             | Antisense | 5'-UCUGAUACUGUAAGCCUUUAGCGUAC-3' |

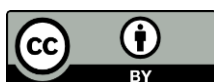

© 2019 by the authors. Licensee MDPI, Basel, Switzerland. This article is an open access article distributed under the terms and conditions of the Creative Commons Attribution (CC BY) license (<http://creativecommons.org/licenses/by/4.0/>).
